# Supplementary material for: Gelation Behaviour of Pluronic F127/Polysaccharide Systems Revealed via Thioflavin T Fluorescence
Source: MDPI journal article supplement (doi:10.3390/gels9120939), 2023-11-30
Supplement: s1 [file s1]

## **Supplementary Material**

### **Gelation Behavior of Pluronic F127/Polysaccharide Systems Revealed by Thioflavin T Fluorescence**

George-Alin Balan, Aurica Precupas, Iulia Matei \*

*“Ilie Murgulescu” Institute of Physical Chemistry of the Romanian Academy,  
202 Splaiul Independentei, Bucharest 060021, Romania*

\* Correspondence: iuliamatei@icf.ro

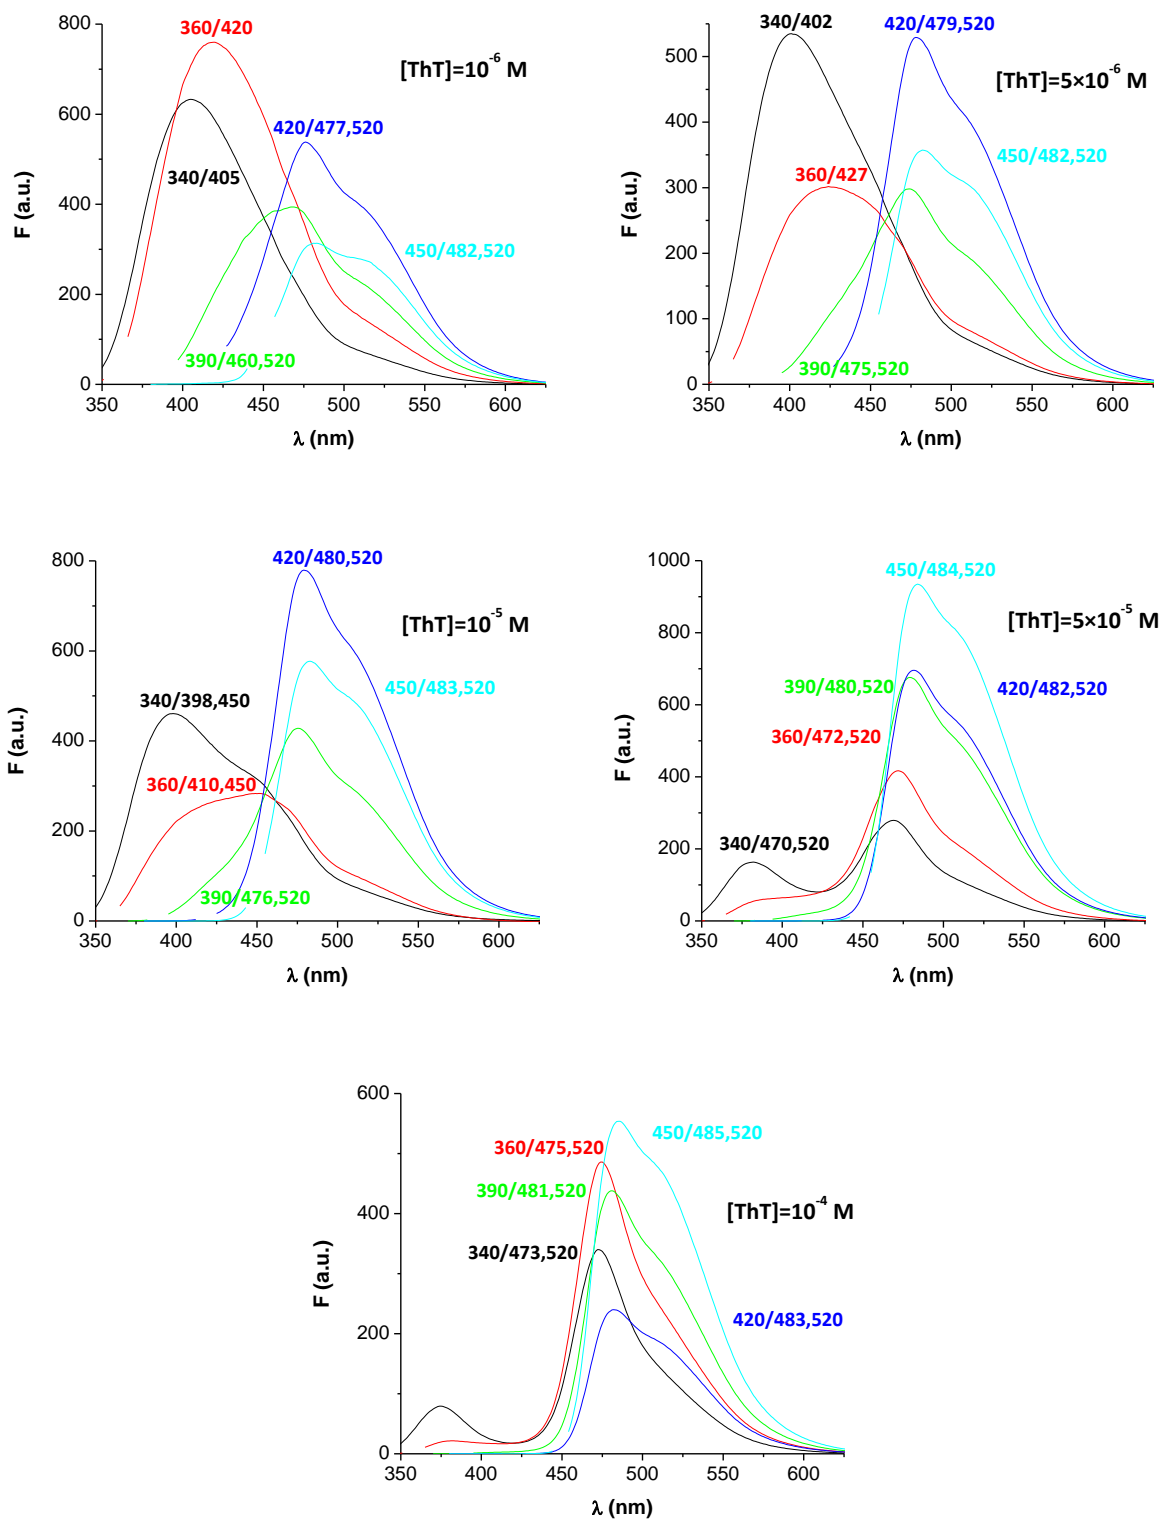

**Figure S1.** Steady-state fluorescence spectra of ThT in glycerol at increasing concentrations in the range  $10^{-6}$ – $10^{-4}$  M. The excitation/emission wavelengths are marked on the spectra. All spectra are recorded in the same conditions.

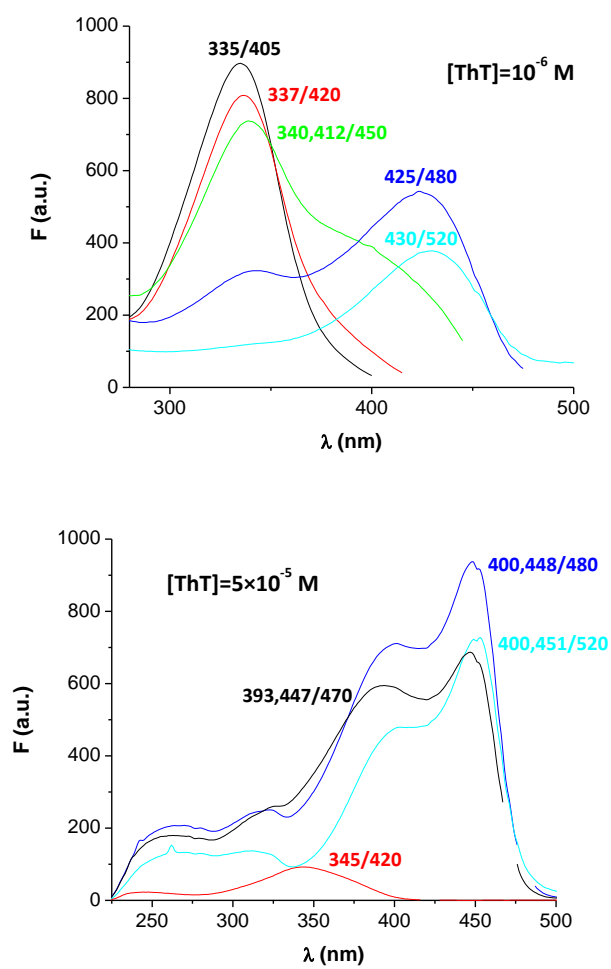

**Figure S2.** Excitation spectra of ThT in glycerol at different concentrations. The excitation/emission wavelengths are marked on the spectra.

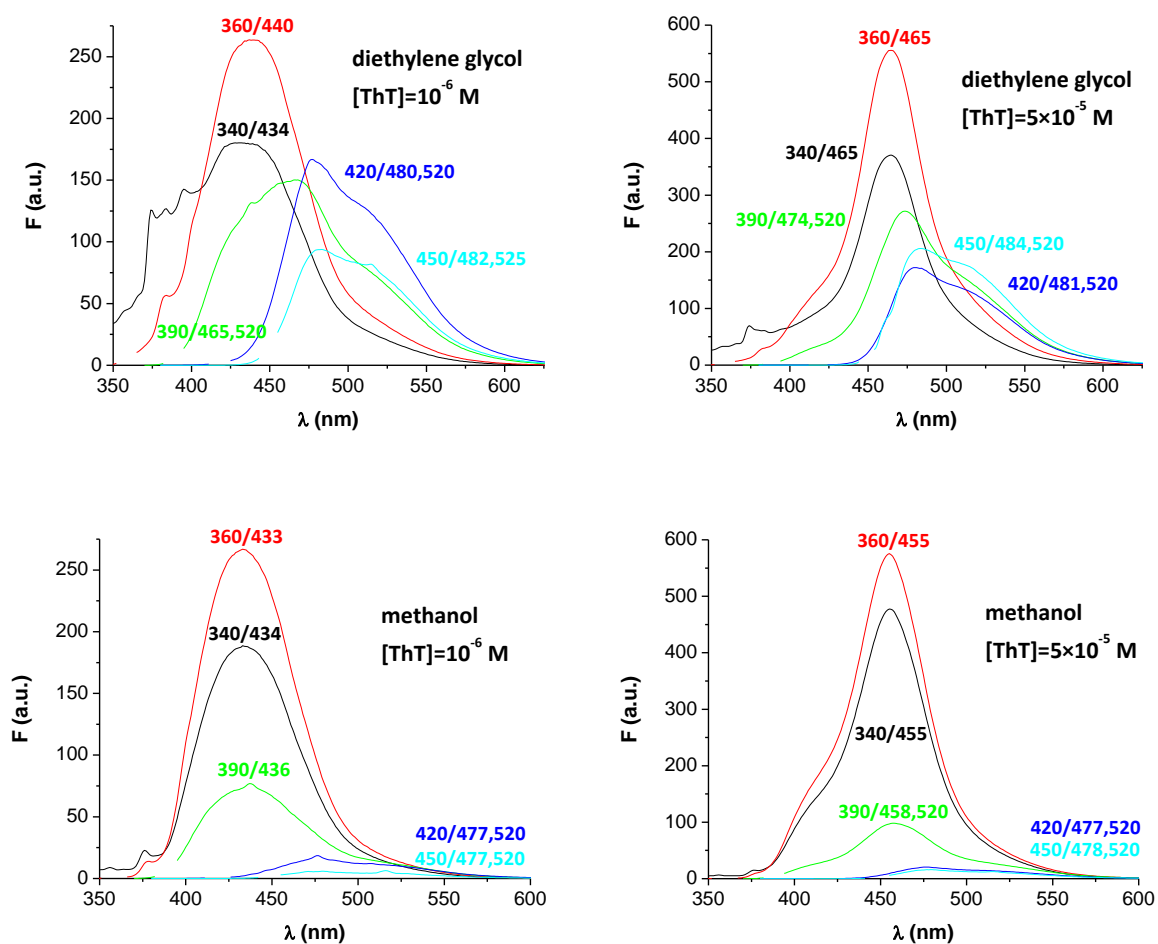

**Figure S3.** Steady-state fluorescence spectra of ThT in diethylene glycol and methanol at different concentrations. The excitation/emission wavelengths are marked on the spectra. All spectra are recorded in the same conditions.

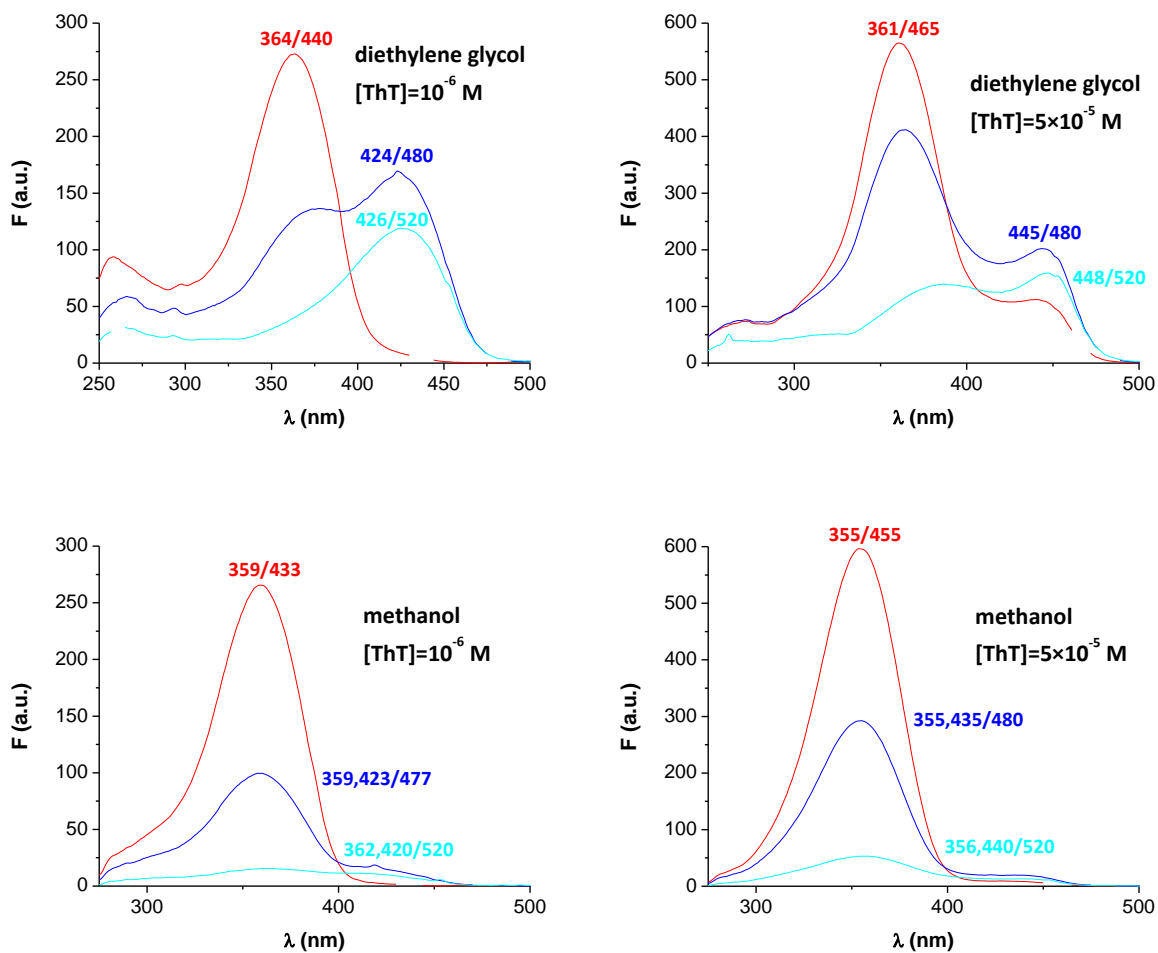

**Figure S4.** Excitation spectra of ThT in diethylene glycol and methanol at different concentrations. The excitation/emission wavelengths are marked on the spectra.

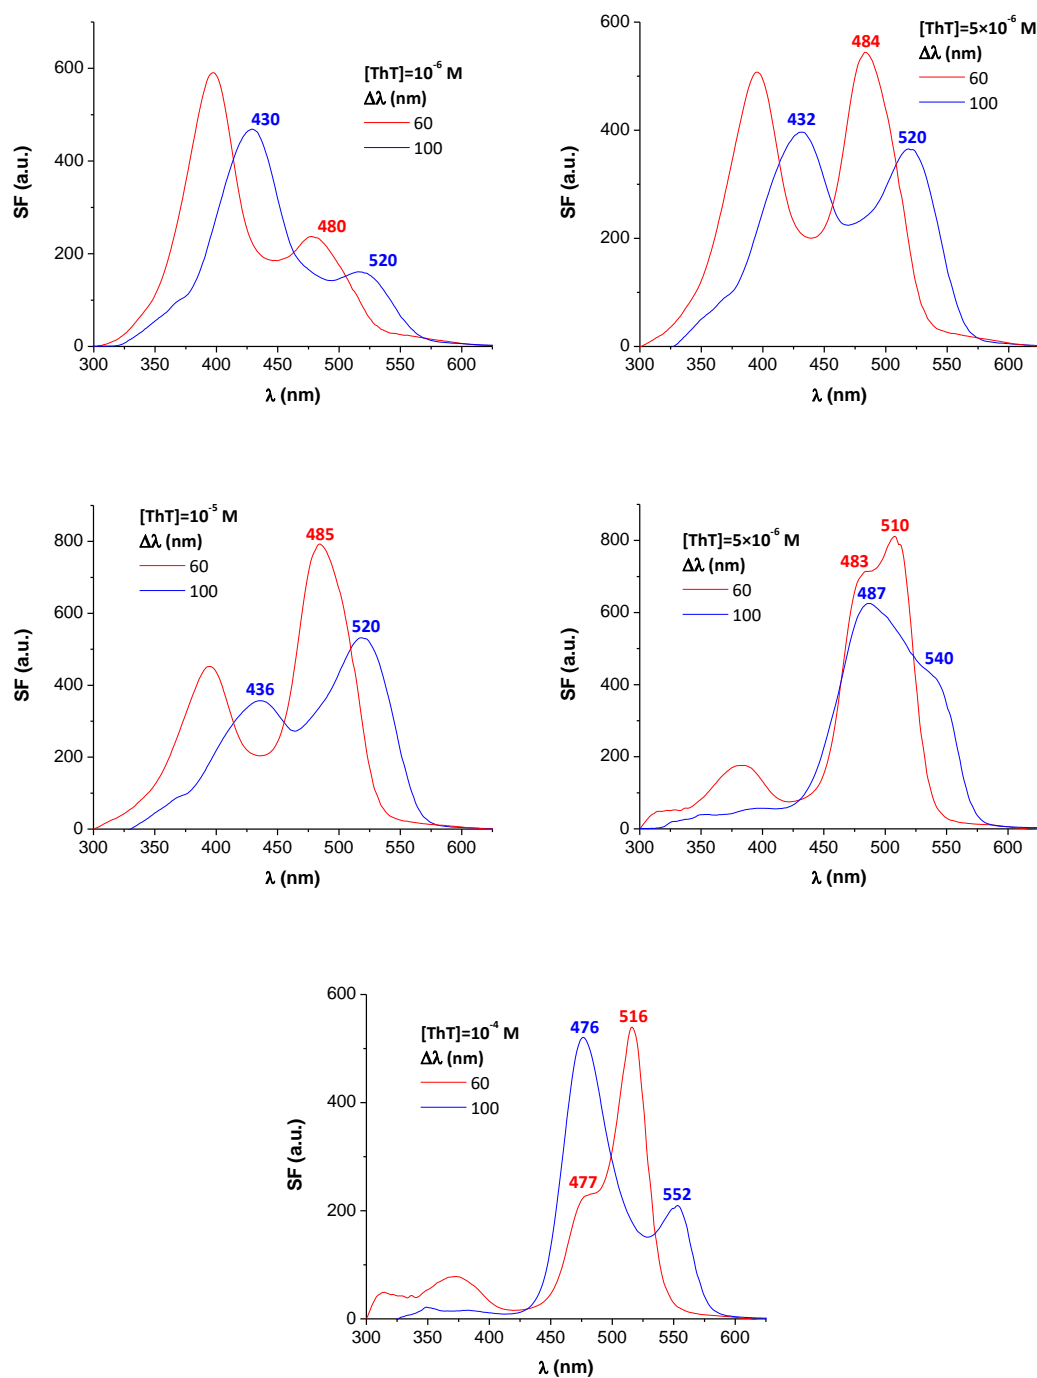

**Figure S5.** Synchronous fluorescence spectra of ThT in glycerol at increasing concentrations in the range  $10^{-6}$ – $10^{-4}$  M. The excitation/emission pairs are marked on the spectra.

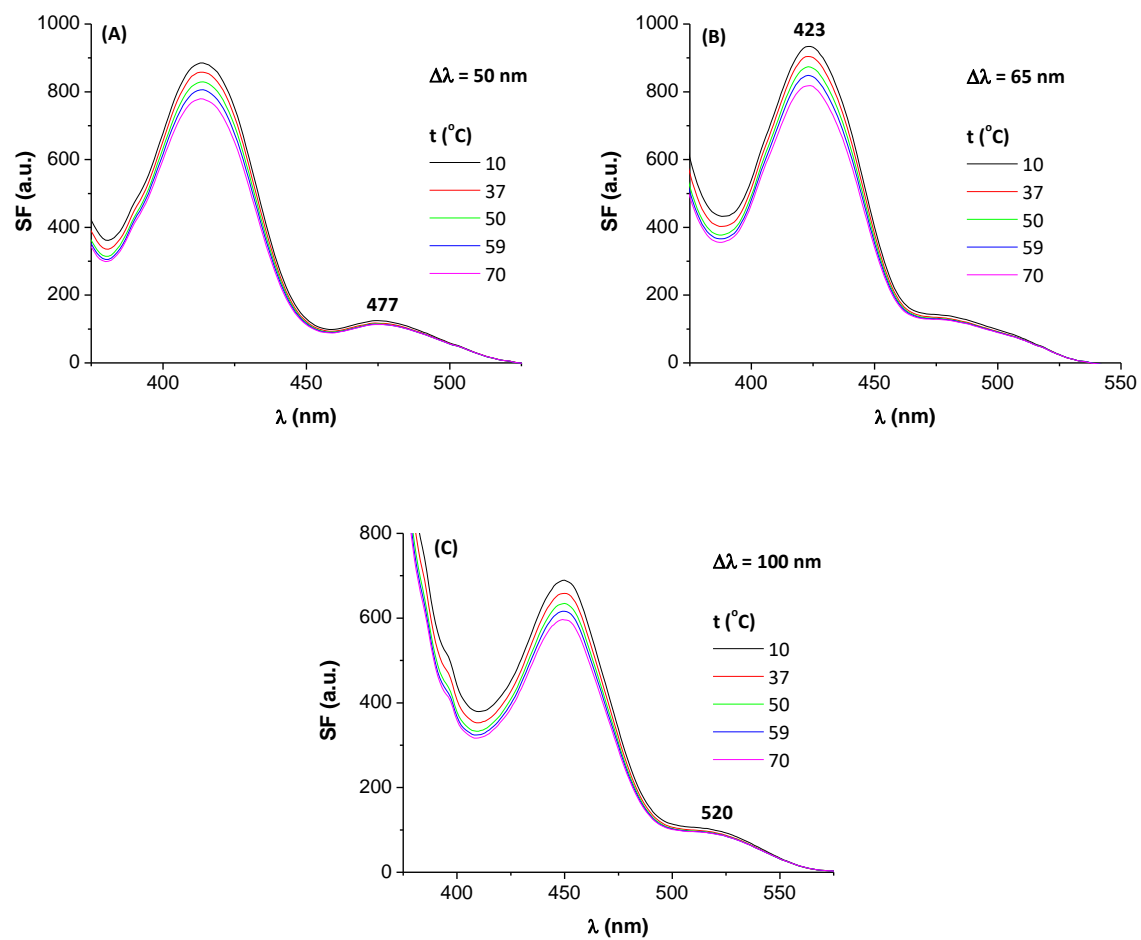

**Figure S6.** Temperature dependence of the synchronous fluorescence spectra of ThT in P16.6%: (A)  $\Delta\lambda = 50$  nm, (B)  $\Delta\lambda = 65$  nm, (C)  $\Delta\lambda = 100$  nm.

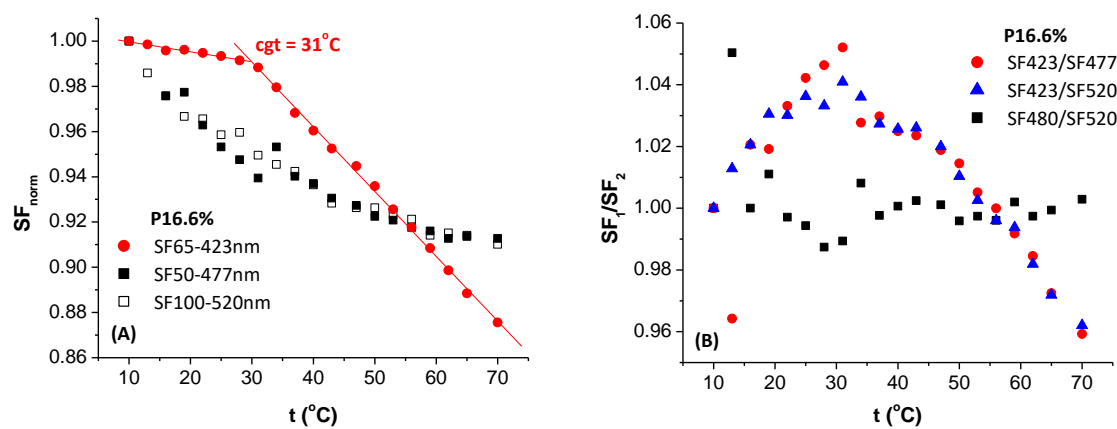

**Figure S7.** Estimation of the critical gelation temperature (cgt) of P16.6% using the synchronous fluorescence intensity (A) and the ratio of ThT synchronous fluorescence intensities (B).



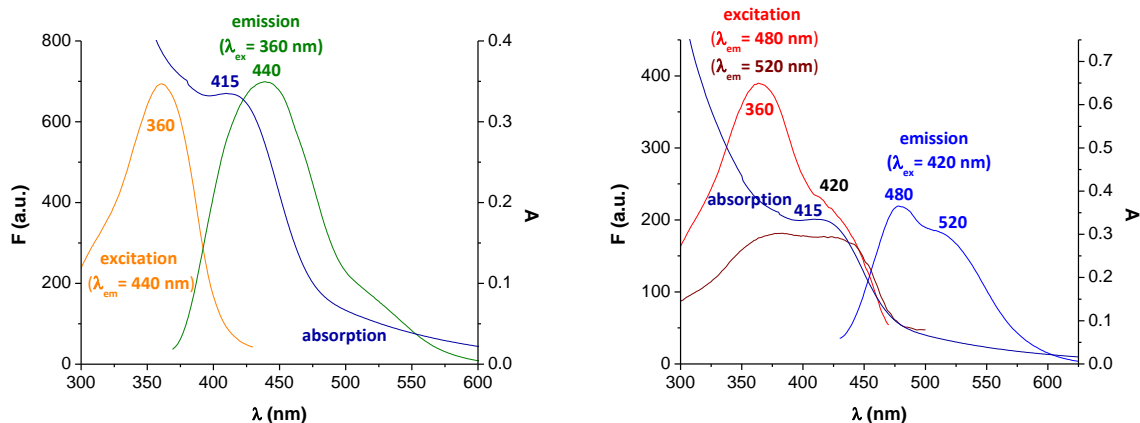

**Figure S8.** Absorption spectrum, excitation spectra recorded at  $\lambda_{em} = 440, 480$  and  $520$  nm and steady-state fluorescence spectra recorded at  $\lambda_{ex} = 360$  and  $420$  nm for ThT in P16.6%ALG2%.

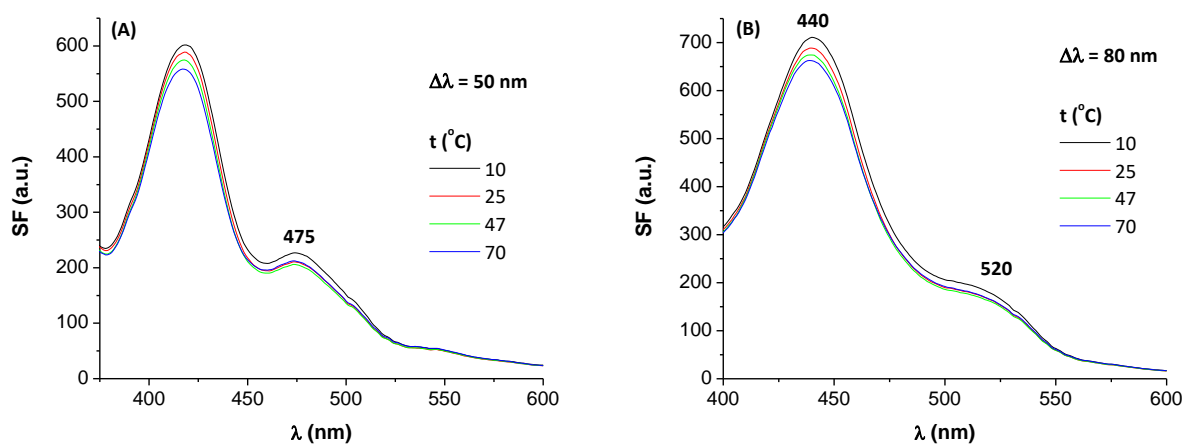

**Figure S9.** Temperature dependence of the synchronous fluorescence spectra of ThT in P16.6%ALG2%: (A)  $\Delta\lambda = 50$  nm, (B)  $\Delta\lambda = 80$  nm.

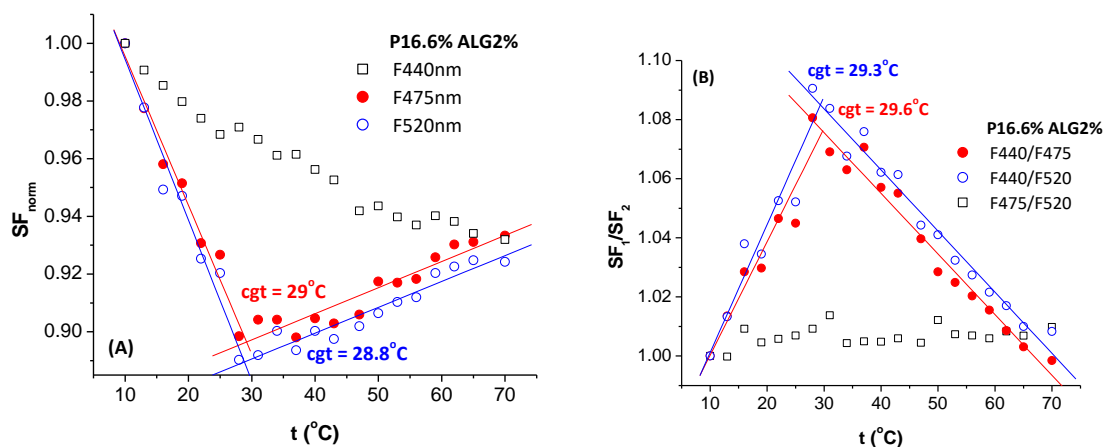

**Figure S10.** Estimation of the critical gelation temperature (cgt) of P16.6%ALG2% using the synchronous fluorescence intensity (A) and the ratio of ThT synchronous fluorescence intensities (B).

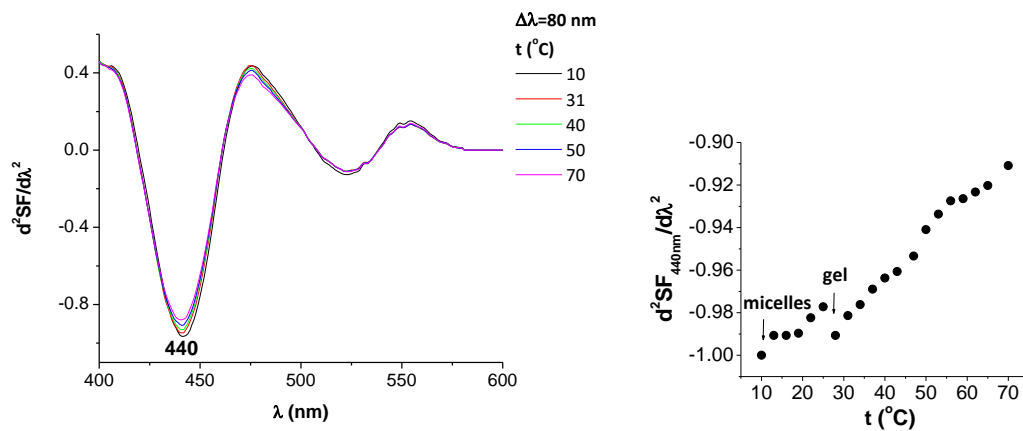

**Figure S11.** Second-derivative synchronous fluorescence ( $\Delta\lambda = 80$  nm) spectra of ThT in P16.6%ALG2%.

Inset: Plot of the second-derivative fluorescence intensity (normalized) at 440 nm as a function of temperature.

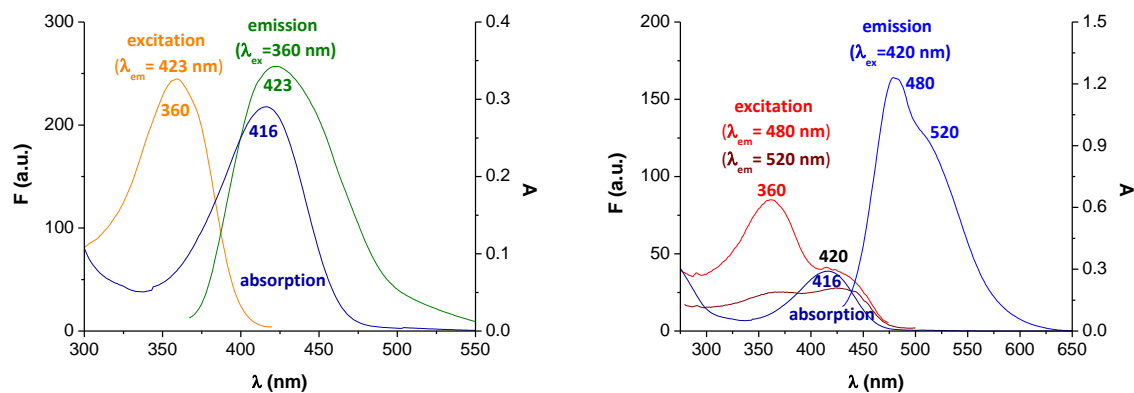

**Figure S12.** Absorption spectrum, excitation spectra recorded at  $\lambda_{em} = 423, 480$  and  $520$  nm and steady-state fluorescence spectra recorded at  $\lambda_{ex} = 360$  and  $420$  nm for ThT in P16.6%HA0.5%.

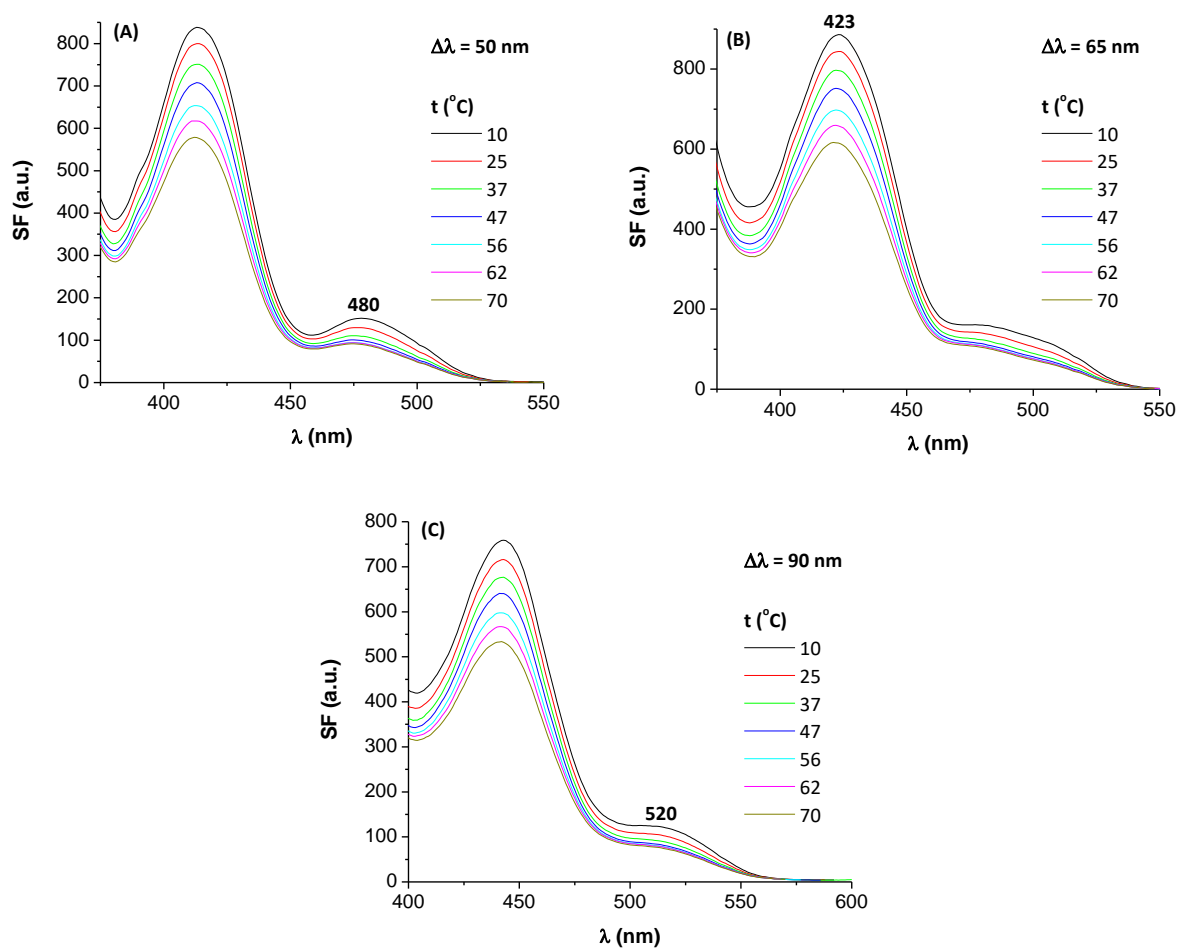

**Figure S13.** Temperature dependence of the synchronous fluorescence spectra of ThT in P16.6%HA0.5%: (A)  $\Delta\lambda = 50$  nm, (B)  $\Delta\lambda = 65$  nm, (C)  $\Delta\lambda = 90$  nm.

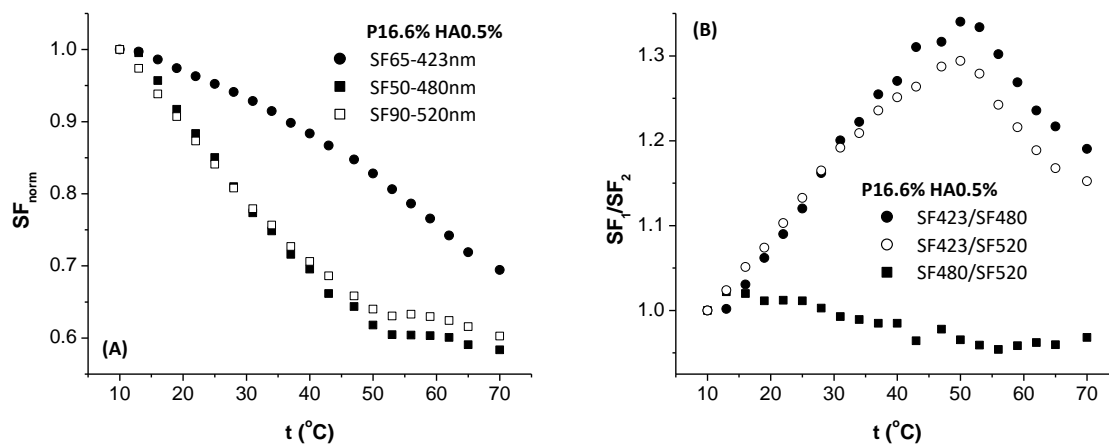

**Figure S14.** Plots of the synchronous fluorescence intensity (A) and of the ratio of ThT synchronous fluorescence intensities (B) of ThT in P16.6%HA0.5% as a function of temperature.

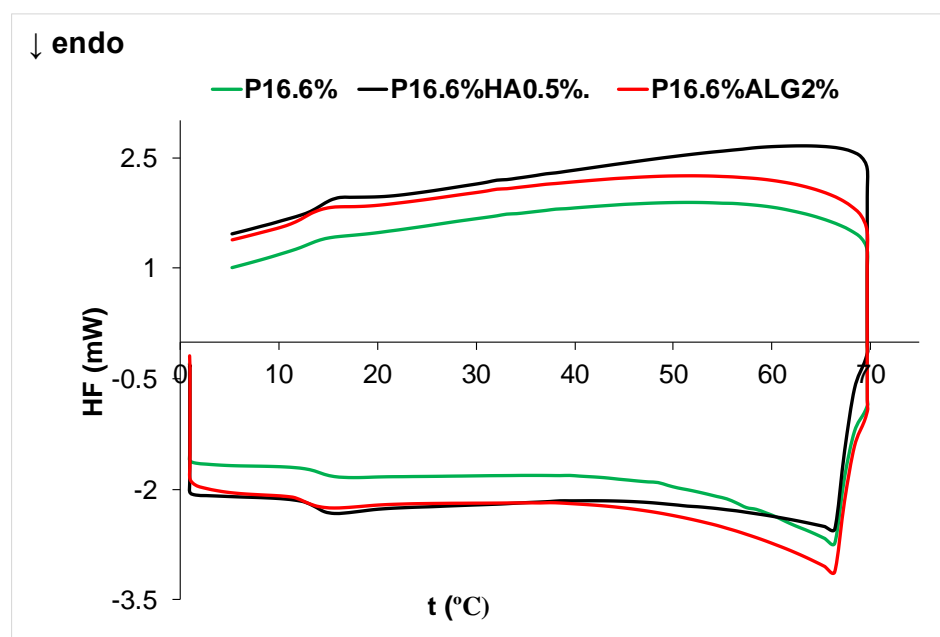

**Figure S15.** Heating and cooling  $\mu$ DSC scans of P16.6% in the absence and in the presence of HA0.5% or ALG2%.

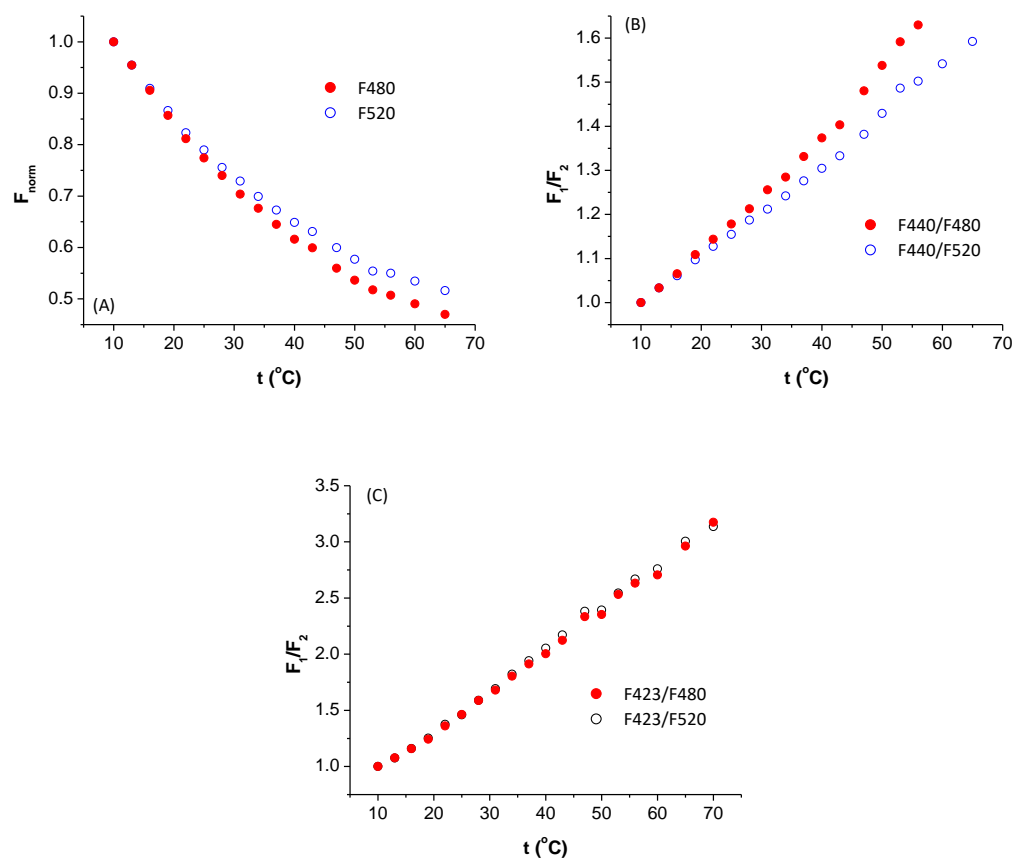

**Figure S16.** Reference plots for alginate (A – steady-state fluorescence intensities, B – ratio of steady-state fluorescence intensities) and hyaluronic acid (C – ratio of steady-state fluorescence intensities) showing no discontinuity at the gelation temperature.
